# Supplementary material for: Foveal and Peripapillary Choroidal Thickness in Adults Born Extremely, Very, and Moderately Preterm With and Without ROP–Results From the Gutenberg Prematurity Eye Study
Source: PubMed Central journal article supplement — Transl Vis Sci Technol. 2022 Jul 8;11(7):4. doi: 10.1167/tvst.11.7.4 (PMC9279923; doi:10.1167/tvst.11.7.4), 2022-07-08
Supplement: tvst-11-7-4_s001.pdf [file tvst-11-7-4_s001.pdf]

# Suppl. Figure 1: Study Design Gutenberg Prematurity Study (GPS)

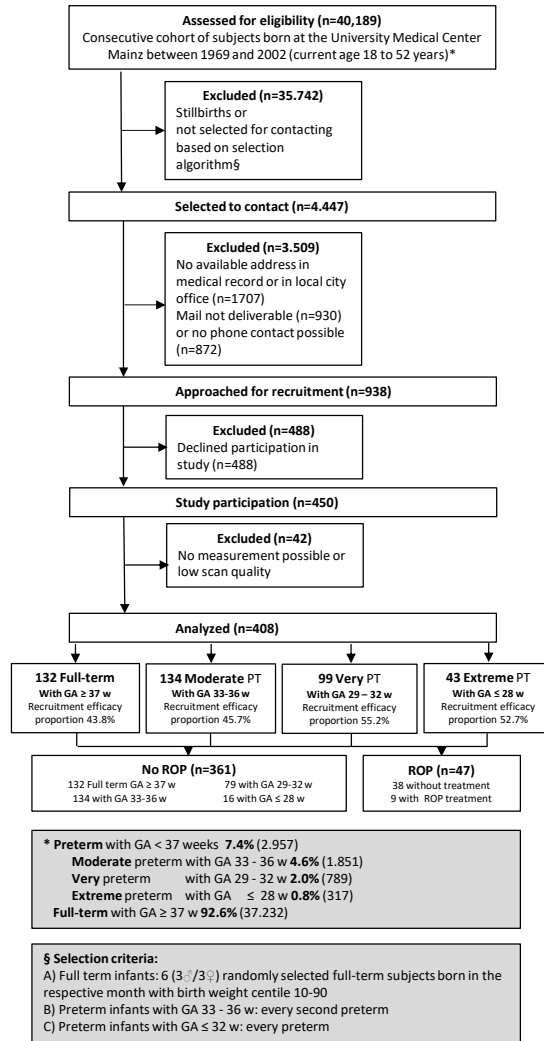

Legend: PT- preterm; GA – gestational age, ROP – retinopathy of prematurity
