# Supplementary material for: Foveal and Peripapillary Choroidal Thickness in Adults Born Extremely, Very, and Moderately Preterm With and Without ROP–Results From the Gutenberg Prematurity Eye Study
Source: PubMed Central journal article supplement — Transl Vis Sci Technol. 2022 Jul 8;11(7):4. doi: 10.1167/tvst.11.7.4 (PMC9279923; doi:10.1167/tvst.11.7.4), 2022-07-08
Supplement: tvst-11-7-4_s002.pdf [file tvst-11-7-4_s002.pdf]

**Supplementary Table 1: Peripapillary and foveal choroidal thickness ( $\mu\text{m}$ ) of the different locations in the Gutenberg Prematurity Eye Study (n=408) stratified by gestational age and ROP status**

| <b>Gestational age</b>                                              | <b>Group 1<br/>GA <math>\geq</math> 37</b> | <b>Group 2<br/>GA 33 - 36<br/>no ROP</b> | <b>Group 3<br/>GA 29 - 32<br/>no ROP</b> | <b>Group 4<br/>GA <math>\leq</math> 28<br/>no ROP</b> | <b>Group 5<br/>GA <math>\leq</math> 32<br/>ROP without<br/>treatment</b> | <b>Group 6<br/>GA <math>\leq</math> 32<br/>ROP with<br/>treatment</b> |
|---------------------------------------------------------------------|--------------------------------------------|------------------------------------------|------------------------------------------|-------------------------------------------------------|--------------------------------------------------------------------------|-----------------------------------------------------------------------|
| Participants/eyes (n)                                               | 132 / 241                                  | 134 / 250                                | 79 / 144                                 | 16 / 29                                               | 38 / 57                                                                  | 9 / 14                                                                |
| <b><u>Choroidal thickness macula (<math>\mu\text{m}</math>)</u></b> |                                            |                                          |                                          |                                                       |                                                                          |                                                                       |
| <b>Right eye</b>                                                    |                                            |                                          |                                          |                                                       |                                                                          |                                                                       |
| Foveal center                                                       | 291.6 $\pm$ 67.5                           | 282 $\pm$ 62.7                           | 283.2 $\pm$ 67.3                         | 304.1 $\pm$ 71                                        | 316.9 $\pm$ 79.8                                                         | 250.7 $\pm$ 53.2                                                      |
| Fovea                                                               | 291 $\pm$ 66.7                             | 282 $\pm$ 61                             | 285.9 $\pm$ 67.3                         | 303.3 $\pm$ 69.7                                      | 313.4 $\pm$ 78.4                                                         | 247.7 $\pm$ 49.3                                                      |
| Inner quadrant superior                                             | 292.4 $\pm$ 64.4                           | 292.8 $\pm$ 61                           | 295.8 $\pm$ 69.4                         | 311.4 $\pm$ 83.1                                      | 307.7 $\pm$ 60.9                                                         | 232.7 $\pm$ 50.1                                                      |
| Inner quadrant nasal                                                | 277.4 $\pm$ 67.2                           | 274.9 $\pm$ 59.9                         | 281.1 $\pm$ 66                           | 294.1 $\pm$ 89.3                                      | 305.8 $\pm$ 78.7                                                         | 247 $\pm$ 42.5                                                        |
| Inner quadrant inferior                                             | 286 $\pm$ 66.3                             | 273.9 $\pm$ 61                           | 284.5 $\pm$ 68.2                         | 298.4 $\pm$ 65.7                                      | 316.7 $\pm$ 88.9                                                         | 257.3 $\pm$ 53.3                                                      |
| Inner quadrant temporal                                             | 295.1 $\pm$ 66                             | 280.4 $\pm$ 60.8                         | 282.6 $\pm$ 68.6                         | 299.6 $\pm$ 59.1                                      | 303.9 $\pm$ 77.4                                                         | 231.7 $\pm$ 64.5                                                      |
| Outer quadrant superior                                             | 292.5 $\pm$ 63.8                           | 296.6 $\pm$ 59.6                         | 300.1 $\pm$ 68.1                         | 306.6 $\pm$ 80.9                                      | 297.6 $\pm$ 56.8                                                         | 223.7 $\pm$ 46.2                                                      |
| Outer quadrant nasal                                                | 262.8 $\pm$ 66.9                           | 262.7 $\pm$ 58.5                         | 269.5 $\pm$ 64.3                         | 282.4 $\pm$ 95.8                                      | 284 $\pm$ 77.6                                                           | 239.3 $\pm$ 31.8                                                      |
| Outer quadrant inferior                                             | 283.8 $\pm$ 66.1                           | 272.1 $\pm$ 62.1                         | 282.8 $\pm$ 65.2                         | 299.4 $\pm$ 71.5                                      | 305.4 $\pm$ 90.4                                                         | 264.3 $\pm$ 43.6                                                      |
| Outer quadrant temporal                                             | 292.9 $\pm$ 65.8                           | 276.9 $\pm$ 60                           | 277.1 $\pm$ 66.2                         | 297.1 $\pm$ 56.3                                      | 291.3 $\pm$ 78.1                                                         | 225.3 $\pm$ 63.7                                                      |
| <b>Left Eye</b>                                                     |                                            |                                          |                                          |                                                       |                                                                          |                                                                       |
| Foveal center                                                       | 287.2 $\pm$ 68.1                           | 285.9 $\pm$ 56.4                         | 292.6 $\pm$ 56.8                         | 266.3 $\pm$ 64.7                                      | 311.7 $\pm$ 64.7                                                         | 197.5 $\pm$ 62.9                                                      |
| Fovea                                                               | 288.7 $\pm$ 67.7                           | 286.3 $\pm$ 54.3                         | 292.4 $\pm$ 55.1                         | 268 $\pm$ 59.1                                        | 311.4 $\pm$ 62.8                                                         | 196 $\pm$ 63.6                                                        |
| Inner quadrant superior                                             | 290.1 $\pm$ 64.6                           | 292.6 $\pm$ 51.9                         | 294.1 $\pm$ 52.8                         | 274 $\pm$ 38.3                                        | 309.8 $\pm$ 66.2                                                         | 204.5 $\pm$ 14.8                                                      |
| Inner quadrant nasal                                                | 277.7 $\pm$ 68.3                           | 275 $\pm$ 55.7                           | 279.4 $\pm$ 52.1                         | 264.3 $\pm$ 71.1                                      | 304.5 $\pm$ 67.5                                                         | 200.5 $\pm$ 47.4                                                      |
| Inner quadrant inferior                                             | 287.5 $\pm$ 66.9                           | 286.3 $\pm$ 54.8                         | 292.8 $\pm$ 57.7                         | 273.3 $\pm$ 72.9                                      | 311.7 $\pm$ 62.9                                                         | 198 $\pm$ 86.3                                                        |
| Inner quadrant temporal                                             | 291.8 $\pm$ 66                             | 292 $\pm$ 52.8                           | 296.5 $\pm$ 57.1                         | 269.7 $\pm$ 34.2                                      | 309.1 $\pm$ 61.3                                                         | 188.5 $\pm$ 53                                                        |
| Outer quadrant superior                                             | 287 $\pm$ 64.2                             | 295.3 $\pm$ 52.9                         | 291.9 $\pm$ 55.9                         | 277.3 $\pm$ 26                                        | 307.6 $\pm$ 64.6                                                         | 232 $\pm$ 17                                                          |
| Outer quadrant nasal                                                | 262.3 $\pm$ 67.7                           | 261.9 $\pm$ 55.2                         | 263.5 $\pm$ 53.1                         | 247 $\pm$ 81.4                                        | 290.2 $\pm$ 72.3                                                         | 199.5 $\pm$ 31.8                                                      |
| Outer quadrant inferior                                             | 285.4 $\pm$ 65.1                           | 285.1 $\pm$ 52.9                         | 292.5 $\pm$ 56                           | 273.3 $\pm$ 86.7                                      | 310.7 $\pm$ 65.5                                                         | 203 $\pm$ 86.3                                                        |
| Outer quadrant temporal                                             | 287.9 $\pm$ 63.5                           | 290.8 $\pm$ 51.5                         | 292.2 $\pm$ 56.2                         | 268.3 $\pm$ 27                                        | 303.3 $\pm$ 61                                                           | 186 $\pm$ 18.4                                                        |
| <b><u>Peripapillary choroidal thickness</u></b>                     |                                            |                                          |                                          |                                                       |                                                                          |                                                                       |
| <b>Right eye</b>                                                    |                                            |                                          |                                          |                                                       |                                                                          |                                                                       |
| Global                                                              | 189 $\pm$ 60                               | 184 $\pm$ 55                             | 192 $\pm$ 58                             | 223 $\pm$ 68                                          | 186 $\pm$ 60                                                             | 187 $\pm$ 71                                                          |
| Superotemporal                                                      | 201 $\pm$ 67                               | 194 $\pm$ 58                             | 204 $\pm$ 63                             | 239 $\pm$ 74                                          | 200 $\pm$ 64                                                             | 201 $\pm$ 80                                                          |
| Temporal                                                            | 198 $\pm$ 74                               | 195 $\pm$ 66                             | 203 $\pm$ 68                             | 241 $\pm$ 65 <sup>#</sup>                             | 205 $\pm$ 67                                                             | 198 $\pm$ 79                                                          |
| Inferotemporal                                                      | 165 $\pm$ 60                               | 164 $\pm$ 60                             | 172 $\pm$ 60                             | 194 $\pm$ 67                                          | 169 $\pm$ 66                                                             | 172 $\pm$ 60                                                          |
| Inferonasal                                                         | 167 $\pm$ 56                               | 162 $\pm$ 55                             | 173 $\pm$ 59                             | 196 $\pm$ 65                                          | 161 $\pm$ 60                                                             | 171 $\pm$ 64                                                          |
| Nasal                                                               | 193 $\pm$ 62                               | 187 $\pm$ 58                             | 194 $\pm$ 59                             | 220 $\pm$ 84                                          | 180 $\pm$ 64                                                             | 181 $\pm$ 73                                                          |
| Superonasal                                                         | 193 $\pm$ 60                               | 187 $\pm$ 55                             | 194 $\pm$ 61                             | 233 $\pm$ 88                                          | 184 $\pm$ 68                                                             | 191 $\pm$ 84                                                          |
| <b>Left Eye</b>                                                     |                                            |                                          |                                          |                                                       |                                                                          |                                                                       |
| Global                                                              | 193 $\pm$ 58                               | 187 $\pm$ 57                             | 195 $\pm$ 58                             | 201 $\pm$ 64                                          | 178 $\pm$ 52                                                             | 187 $\pm$ 144                                                         |

|                |          |          |          |          |                       |           |
|----------------|----------|----------|----------|----------|-----------------------|-----------|
| Superotemporal | 203 ± 60 | 199 ± 62 | 209 ± 68 | 216 ± 62 | 187 ± 61              | 202 ± 147 |
| Temporal       | 202 ± 67 | 196 ± 64 | 200 ± 69 | 211 ± 67 | 194 ± 59              | 202 ± 163 |
| Inferotemporal | 169 ± 58 | 164 ± 57 | 171 ± 62 | 172 ± 63 | 157 ± 54              | 180 ± 149 |
| Inferonasal    | 168 ± 57 | 162 ± 60 | 170 ± 56 | 175 ± 60 | 144 ± 51 <sup>#</sup> | 156 ± 116 |
| Nasal          | 199 ± 63 | 193 ± 68 | 201 ± 58 | 206 ± 74 | 183 ± 58              | 182 ± 133 |
| Superonasal    | 200 ± 63 | 198 ± 66 | 207 ± 65 | 211 ± 81 | 185 ± 59              | 195 ± 150 |

GA – gestational age; ROP – Retinopathy of Prematurity;  $\mu\text{m}$  – micrometer. OD – right eye, OS – left eye
